# Supplementary material for: Preoperative SII and LAR as a New Predictor for Early Allograft Dysfunction in Adult Living Donar liver transplantion
Source: Research Square preprint supplement (doi:10.21203/rs.3.rs-8639163/v1), 2026-02-04
Supplement: Supplementary file 1 [file 0dd4bf6236cdfae781ad52eb.xlsx]

## Sheet: 预测价值数据表
		Preoperative Data																				Intraoperative Data						Postoperative Data
Number	EAD（0 = Absent, 1 = Present）	Gender (0=Female, 1=Male)	Age	BMI	Primary Disease*	MELD 3.0 Score	Child Score	Child-Pugh Score	CP Score （1A2B3C）	ALT	AST	ALB	TB	DB	Scr	Neutrophil Count	Lymphocyte Count	Platelet Count	Lactate	SII	LAR	Auxiliary Transplantation (1=Yes, 0=No)	Splenectomy (1=Yes, 0=No)	GRWR	Graft Type (0=Left, 1=Right)	Cold Ischemia Time	TIPS/Portosystemic Shunt (1=Yes, 0=No)	D1-ALT	D2-ALT	D3-ALT	D4-ALT	D1-AST	D2-AST	D3-AST	D4-AST	D1-ALB	D2-ALB	D3-ALB	D4-ALB	D1-TBil	D2-TBil	D3-TBil	D4-TBil	D1-DBil	D2-DBil	D3-DBil	D4-DBil	D1-Scr	D2-Scr
1	0	0	23	13.1492	3	21	14	C	3	18	58.7	34.5	59.26	28.74	98.6	2.04	0.46	7	1	31.0435	0.0289855	0	1	0.97	0	80	0	393	328	242	194	973.7	365.8	187.2	126.9	31.8	34.2	33.4	35.3	95.07	102.89	76.46	96.92	45.57	45.97	44.3	56.13	96.4	96.7
2	0	1	51	22.4913	0	9	5	A	1	60	72.8	32.2	13.55	5.01	72.1	0.85	0.46	61	1.3	112.717	0.0403727	1	0	0.69	1	79	0	458	564	501	341	678.7	525.3	326.3	152	37.7	32	31.5	33.3	28.77	16.6	12.11	19.25	10.53	7.65	5.05	9.2	96	76.5
3	0	1	60	16.1059	0	6	5	A	1	58	37.7	36	8.1	4.01	76.4	2.7	1.06	207	1.5	527.264	0.0416667	0	0	1.2	1	152	0	537	472	359	273	785.4	391.6	188.4	120	41.2	37.9	37.4	36.8	26.84	19.79	16.58	9.53	13.62	7.8	7	4.56	77	62
4	0	1	56	23.5036	1	17	8	B	2	11	21.9	35.6	30.37	11.47	83.5	0.77	0.34	28	1.6	63.4118	0.0449438	0	0	0.86	1	136	0	728	376	134	171	1279.2	300.2	164	66.8	38.7	35.8	35.1	34.5	124.21	76.91	47.8	32.59	51.03	28.25	21.67	15.13	80.1	88.6
5	0	0	19	23.6244	3	25	10	C	3	56	52.6	37	378.59	142.36	36.5	2.77	1.81	132	1.66	202.011	0.0448649	1	0	0.73	0	130	0	227	121	93	93	123.5	87	66.6	72.9	33.2	30.5	32.7	29	302.76	104.13	102.32	103.44	125.66	47.76	53.87	56.41	43.7	32.1
6	1	0	69	22.3133	2	33	9	B	2	79	162.1	28.6	607.77	266.05	140.5	2.43	0.6	41	0.4	166.05	0.013986	0	0	1.08	1	144	0	348	383	285	207	573.3	253.4	112.1	60.1	37.2	36.6	37.3	35.6	318.82	338.32	370.62	366.65	147.6	173.6	193.36	185.56	122	74
7	0	1	29	24.0238	3	14	9	B	3	19	26.2	32.5	42.03	16.01	67.6	2.4	0.57	56	1.11	235.789	0.0341538	1	1	0.6	0	136	0	738	574	518	348	762.8	408.4	266.5	110	38.4	32.3	36	35	127.49	52.83	73.35	74.02	78.56	24.27	36.78	39.25	86.8	57.2
8	0	0	60	16.5607	5	26	12	C	3	56	161.8	31.5	438.99	202.22	44.4	11.01	0.74	62	1.3	922.459	0.0412698	0	0	0.65	0	134	0	234	179	151	98	470.9	233.4	114.6	58.9	28.9	35.1	32.6	32.0	145.55	62.54	48.25	26.78	60.98	26.77	23.75	18.98	131.2	72.4
9	0	1	30	23.03	0	27	11	C	1	38	38.6	33.3	464.05	209.94	69	2.66	0.9	62	1.62	183.244	0.0486486	0	0	1.23	1	65	0	214	159	121	109	523	152.3	74.7	53.7	34.1	35.2	38.8	39.8	170.55	115.66	99.34	81.05	65.43	45.58	44.62	35.6	76.3	60.4
10	1	0	45	20.1951	5	26	11	C	2	111	159.1	40.9	751.44	261.14	74.5	10.1	1.56	139	1.83	899.936	0.0447433	0	0	0.68	0	96	0	520	700	428	326	541.6	578.5	238.1	131.2	37.7	44.5	43.5	39.8	411.31	313.67	239.49	279.48	183.15	135.74	123.7	141.67	94	39.5
11	0	0	38	22.4059	0	12	6	A	3	7	18.8	39.3	20.51	5.9	59.4	0.57	0.26	33	1.1	72.3462	0.0279898	1	1	0.46	0	136	0	260	192	175	119	605.7	262.4	149.6	74.3	43.8	36.6	39.2	37.3	86.75	23.5	31.83	28.05	47.98	8.68	12.34	11.29	51.8	38.1
12	0	0	50	21.1553	2	9	8	B	3	28	55	31.2	16.62	8.5	62.5	1.16	0.42	37	1.6	102.19	0.0512821	0	0	0.64	0	79	0	144	108	85	66	330.5	132.1	80.4	51.1	32.1	30.9	31.6	28.7	96.61	38.78	23.84	18.17	46.91	15.79	10.7	8.75	60.4	45.8
13	1	1	45	25.1241	1	23	11	C	2	17	28.7	31.5	179.03	85.26	52.1	1.76	0.61	33	1.3	95.2131	0.0412698	0	0	0.77	1	144	0	294	223	189	118	316.4	110.3	49.3	25.6	29.8	31.5	34.7	34.3	218.44	139.14	144.3	171.8	98.47	61.19	72.28	82.75	76	50.5
14	0	1	46	21.1327	1	16	11	C	2	33	84.5	26.4	51.63	20.7	65.1	1.85	1.62	50	1.7	57.0988	0.0643939	0	0	1.06	0	110	0	381	391	1157	1145	549	344.1	1557	970.1	34	35.3	35.1	34.2	98.75	82.44	74.73	75.62	45.73	44.49	42.07	39.5	77.1	56.4
15	1	0	58	25.3902	5	10	5	A	3	25	44.6	37.2	30.3	8.02	56.8	0.9	0.44	37	1.3	75.6818	0.0349462	0	0	0.78	0	134	0	483	370	249	189	646.1	242.7	113.5	78.3	37.1	36.2	33.5	34.2	56.05	26.69	34.69	23.87	25.17	11.23	12.69	10.54	64.7	58.9
16	1	0	46	24.977	4	32	13	C	1	31	50.9	33.8	752.87	251.32	60.5	6.76	1.15	50	2.03	293.913	0.0600592	0	0	0.67	0	40	0	180	157	112	74	240.5	167.1	108.9	60.1	28.5	33	34.6	31.1	454.86	206.49	191.37	160.27	213.75	86.04	86.93	70.96	101.8	89.3
17	0	1	64	19.721	0	17	11	C	3	6	22.8	26.7	107.12	39.99	54.7	1.02	0.29	34	1.2	119.586	0.0449438	0	0	0.75	0	74	0	203	95	69	49	283.7	74.1	43.3	26.7	32.1	32.3	32.9	33.8	341.98	128.47	97.8	87.96	133.67	53.04	48.86	38.68	100.2	72.7
18	0	1	53	24.6914	5	9	7	B	1	64	71.2	32.8	18.75	7.24	63.8	1.19	0.57	80	3.5	167.018	0.106707	1	0	0.477	0	80	0	300	249	217	166	423.2	207	161.5	93.9	33.2	33.3	33.1	32.8	72.07	39.33	36.07	44	33.13	18.01	17.93	24.38	78.5	63.6
19	0	1	64	20.7008	0	23	8	B	3	128	92.6	27	16.71	10.59	642.9	7.38	0.14	42	0.66	2214	0.0244444	1	0	0.612	0	104	0	225	185	157	128	541.3	205.4	161.2	92.6	29.5	32.3	27.1	27	61.5	20.3	15.47	16.71	45.84	10.07	8.58	10.59	537.2	295.7
20	0	1	52	16.6667	5	22	11	C	2	34	57.6	35.3	168.94	76.85	66.8	3.6	0.56	81	1.2	520.714	0.0339943	0	0	1.2	1	86	0	217	168	126	80	257.9	121.2	69.7	51.5	36.1	35.5	36.1	34.8	162.46	93.71	79.02	69.89	70.51	42.09	38.33	35.81	99.3	91.4
21	0	1	29	17.9931	5	23	6	A	1	12	27	33	29.51	12.43	231.8	2.49	0.9	53	1.3	146.633	0.0393939	0	0	1.13	1	144	0	200	203	191	139	518.5	254	175.8	108.5	37.8	39	35.8	39.4	134.15	49.27	28.94	25.95	71.88	29.43	16.09	13.86	289.9	440.9
22	0	1	57	23.7387	4	30	13	C	1	73	155.3	34.3	711.42	303.48	72.8	7.82	0.76	62	2.2	637.947	0.0641399	0	0	0.92	1	80	0	393	373	273	192	379.8	251	121.5	64.5	32.1	34.6	34.6	34.9	215.42	140.43	160.97	160.5	107.61	68.11	84.58	88.59	100.7	67.8
23	0	1	19	19.4874	2	11	6	A	1	73	112.1	30.1	139.96	62.1	43.8	1.08	0.94	115	1.3	132.128	0.0431894	0	0	0.88	1	110	0	323	271	212	179	441.6	235.8	127.2	107.8	37.3	33.2	32.7	34	125.87	86.25	62.97	64.99	51.65	37.19	27.88	29.39	56	51.6
24	1	0	33	17.9688	2	24	10	C	2	28	132.1	28.2	373.51	178.2	30.9	4.85	1.33	233	1.3	849.662	0.0460993	0	0	0.86	0	82	0	303	255	207	124	1118.7	509.7	285.6	117	36.3	36.1	33.7	31.6	241.36	207.24	232.01	189.24	109.52	92.39	107.78	91.48	32.9	27.3
25	0	1	37	19.8141	5	19	12	C	2	19	95.7	28.7	112.64	42.55	40.7	3.83	1.24	48	0.8	148.258	0.0278746	0	0	0.86	1	134	0	309	260	197	127	389.2	180	85.5	43.7	34.7	36.1	34.9	33.9	99.49	73.34	60.7	50.71	26.91	21.01	16.71	14.6	43.9	32.6
26	0	0	30	19.1406	5	14	7	B	1	12	17.8	32.8	26.29	8.13	51	84.6	0.48	47	1.3	8283.75	0.0396341	1	1	0.61	0	86	0	362	354	242	225	467.9	255	116.3	119.5	36.1	39.1	39.5	35	65.39	39.1	36.92	46.7	29.1	15.36	16.31	27.68	50.2	35.5
27	0	1	49	16.7872	0	9	6	A	3	23	32.8	37	25	8.22	57.7	2.87	1.14	46	2.3	115.807	0.0621622	0	0	0.79	0	237	0	615	331	620	594	822.8	212.5	395	176.2	44.2	35.7	33.9	35.7	90.69	67.47	49.27	44.32	33.69	20.45	20.08	21.19	66	70.3
28	0	1	58	30.9304	5	9	6	A	3	30	41.9	33.5	22.77	7.32	78.6	2.3	1.03	116	1.3	259.029	0.038806	0	0	0.81	1	118	0	576	374	264	246	760.5	252.3	129.5	102.3	37.1	36.2	33.5	34.2	69.25	20.36	20.47	48.57	36.61	6.93	9.15	21.55	139.6	142.3
29	0	1	39	24.7252	0	8	6	A	1	24	43.9	30.8	14.31	5.66	69.4	0.9	0.5	41	1.3	73.8	0.0422078	0	0	0.8	1	136	0	195	156	148	109	244.6	143.8	110.3	87.4	36.8	33.4	33.5	33.7	78.14	39.56	27.34	20.65	31.54	15	10.65	8.05	87	73.3
30	0	1	36	23.5134	1	9	7	B	3	24	24.2	35.3	18.05	6.06	67.5	1.76	0.59	98	1.5	292.339	0.0424929	1	0	0.4	0	80	0	748	734	532	371	641.1	497	245.7	109.2	37.3	35	34.4	35	66.67	54.14	38.91	36.92	23.9	23.25	16.63	15.29	80.3	75.6
31	0	1	57	20.984	0	14	7	B	2	28	30.5	35.5	31.93	8.22	107.3	1.33	0.73	40	1.5	72.8767	0.0422535	1	0	0.5	0	70	0	822	1572	916	532	888.7	971.1	382.8	150.7	34.4	33.1	33.3	34.8	60.93	21.45	13.42	17.5	32.18	10.56	7.65	9.36	114.7	171.9
32	0	1	66	25.0593	5	10	5	A	3	48	61.5	37.8	26.3	9.54	67.1	2.98	1.36	99	1.3	216.926	0.0343915	0	0	0.73	1	108	0	254	224	209	241	356.8	208.2	152.7	208.6	35.7	37.1	40.5	41.5	62.82	42.28	31.01	35.54	20.49	15	13.07	16.67	108.1	76.8
33	1	0	58	22.8928	5	27	11	C	2	46	118.1	35.8	668.34	303.77	79.1	3.74	0.39	45	0.6	431.538	0.0167598	0	0	1	1	99	0	297	356	263	202	414.7	308	143.4	91	40	41.2	39.3	39.9	376.12	322.74	289.22	276.59	184.74	178.56	158.29	164.89	80.7	70
34	0	1	32	21.551	0	16	12	C	3	21	22.3	32.9	42.1	12.28	58.7	0.58	0.42	44	1.4	60.7619	0.0425532	0	0	0.67	0	40	1	278	193	155	121	483.8	183.1	109.2	68.7	36	35.5	35.4	34.6	73.92	49.43	41.89	52.52	21.23	16.39	14.76	14.56	70.4	59
35	1	1	61	20.7612	3	6	9	B	2	19	27.5	43.4	10.51	4.36	81.1	2.48	0.43	187	1.3	1078.51	0.0299539	0	0	0.62	0	30	0	455	639	595	501	465.7	389.3	291.3	159.7	54.3	44.4	37.6	40.9	82.43	55.57	58.1	49.03	26.93	18.5	17.97	18.14	69.9	80.5
36	0	0	56	21.5139	5	19	11	C	2	25	43.1	36.6	57.57	18.01	51	2.36	0.42	22	1.6	123.619	0.0437158	0	0	1.14	0	70	0	356	383	311	232	381.5	239.1	134.5	82.4	32.9	33	36.6	38.9	170.13	144.98	128.69	105.77	41.5	48.68	60.6	52.88	71.3	61.8
37	0	0	33	21.5139	5	12	6	A	3	18	23.7	37.3	29.6	9.16	46.3	1.29	1.05	55	1.7	67.5714	0.0455764	0	0	0.58	0	50	0	126	154	131	113	195.2	139.1	89.2	56.6	44.7	40.7	38.7	42	139.94	118.89	100.17	139.11	50.36	37.33	45.03	60.52	48.9	39.3
38	0	1	41	26.2346	0	30	13	C	3	31	78.9	31	600.11	278.32	106.3	1.87	0.2	37	1.28	345.95	0.0412903	0	0	0.59	1	95	1	300	265	190	123	680.2	317.7	159	74.4	34.9	32.4	32.2	31.9	240.16	206.72	226.09	269.74	134.99	128.89	146.5	169.77	46.4	127.3
39	1	0	54	20.3954	2	22	11	C	3	41	92	39.1	114.17	72.7	77.9	4.7	0.67	125	0.93	876.866	0.0237852	0	0	1.11	0	67	0	481	376	510	345	624.1	280.7	383.3	201.6	37	33.8	32.9	25.3	160.96	132.37	155.5	155.44	84.7	78.58	92.78	103.06	98.9	100.4
40	1	0	54	22.0604	3	32	12	C	3	106	133.2	33.5	504.11	233.73	40.2	3.27	0.88	54	1.34	200.659	0.04	0	0	0.6	0	40	0	168	145	145	127	445.4	265.5	168.3	117.1	36.8	38.1	40.5	35.6	367.19	407.99	451.11	405.99	163.95	163.85	203.54	183.85	72.9	68
41	0	0	54	23.7253	2	16	9	B	3	49	92.4	27.1	57.54	32.64	78.6	1.68	0.58	48	1.3	139.034	0.0479705	0	0	0.81	0	58	0	303	184	134	54	382.9	124.8	70	50	34.4	33	29.9	30.3	135.58	103.1	54.24	30.79	44.06	36.95	32.15	17.89	73.7	78.5
42	0	1	45	34.2561	5	13	10	C	2	25	31.2	37.5	39.84	11.71	49.4	1.49	0.52	24	1.3	68.7692	0.0346667	1	1	0.48	1	157	0	298	342	259	166	519.9	354.3	186.9	95.4	43.4	38.8	35.3	33.9	48.68	14.79	9.62	9.85	48.68	14.79	9.62	9.85	70.8	56.7
43	1	1	46	24.7721	0	17	10	C	3	11	49.1	30.8	35.05	13.99	58.4	1.08	0.7	21	3.92	32.4	0.127273	0	0	0.974	1	102	0	228	165	138	90	306.9	89	62.4	40.2	32.2	33.4	31.9	30.9	150.57	108.52	81.68	111.16	61.86	37.29	35.58	53.69	89	68.6
44	1	0	47	13.1111	5	18	12	C	1	48	96.5	29	448.95	204.2	41.1	1.36	0.18	44	1.5	332.444	0.0517241	0	0	0.67	0	60	1	387	241	226	156	992.8	398.4	248.9	111.8	35.4	33.3	31.4	32.4	162.61	177.34	176.28	185.64	76.02	76.6	93.6	104.37	49.3	88.3
45	0	1	51	17.3745	0	10	8	B	2	23	33.9	39.4	12.44	5.86	89.9	2.24	0.43	105	1.6	546.977	0.0406091	0	0	0.803	0	65	0	238	159	122	91	403.3	124.7	68.8	45.8	39.5	34.4	33.6	38.2	158.46	97.01	53.23	58.99	60.48	36.03	26.66	28.33	90.3	79.3
46	0	0	44	26.2917	3	16	10	C	3	11	30	25.3	29.72	8.26	51.9	1.22	1.78	130	5.3	89.1011	0.209486	0	1	1.09	1	68	0	261	232	214	151	399.3	207.1	121.5	56	28.4	28.6	30.8	29.4	24.49	18.26	22.35	18.03	8.05	6.89	7.56	6.79	73.4	76.4
47	0	0	50	18.75	2	8	7	B	3	12	24.8	40.7	23.9	7.32	62.4	0.72	0.35	64	1.3	131.657	0.031941	0	0	0.662	0	40	0	184	142	107	90	164.8	110	70.3	50.9	37.8	37.8	38.8	36	78.06	67.59	56.3	66.49	22.58	21.69	18.76	29.39	55.2	56.7
48	0	1	53	18.8092	0	16	8	B	2	17	47.5	28.7	24.28	9.17	62.7	1.74	1.33	66	1.4	86.3459	0.0487805	0	0	0.679	1	145	0	385	372	283	270	748.3	334.7	169.5	90.7	39.6	41	40.2	39.9	112.75	180.65	180.94	190.31	47.28	82.43	101.94	64.1	64.1	68
49	0	0	22	22.7204	3	28	13	C	3	15	46.9	27.7	148.97	76.51	83	1.57	0.89	50	1.6	88.2022	0.0577617	0	0	1.03	1	80	0	233	183	151	101	471.8	233.4	115.7	57.6	28.9	34.1	31.6	32.0	143.91	62.64	47.35	27.87	61.86	27.74	23.75	19.13	130.9	72.8
50	0	0	58	23.1345	2	20	10	C	2	38	95	30.1	141.44	87.17	61.1	8.65	0.17	34	1.6	1730	0.0531561	0	0	0.574	0	60	0	133	115	82	72	243.8	127	70.4	61.5	37.8	33.3	33.4	37	139.55	91.57	70.22	68.31	56.74	33.11	40.69	39.77	61.6	77.6
51	1	1	57	20.6852	0	26	9	B	3	32	54.4	31.5	460.24	242	93.6	1.38	0.1	55	2.03	759	0.0644444	0	0	1	1	165	0	314	335	269	170	339.4	229.9	117.8	52.4	34	33.2	31.1	31.2	328.02	184.77	191.56	221.85	178.11	95.17	107.14	116.9	68.9	60.6
52	0	1	28	20.1995	3	16	12	C	3	26	38.9	29.1	51.38	16.5	52.3	1.73	0.65	26	1.7	69.2	0.0584192	0	0	1.03	1	80	0	491	537	487	396	554	353.7	233.2	124.1	35.4	29.8	30.9	36.7	65.36	31.12	20.79	25.4	26.88	15.37	10.32	10.85	61.6	64.9
53	0	0	55	20.2688	0	20	11	C	1	64	102.5	31.7	89.84	42.31	69.7	2.35	1.15	52	1.48	106.261	0.0466877	0	0	0.7	0	75	0	230	195	162	128	301.4	189.9	119.9	74.6	31.1	28.5	31.4	34.4	61.46	45.28	39.25	37.84	26.75	19.09	17.65	16.99	57.5	44
54	1	1	33	23.0681	0	23	13	C	3	159	121.7	25.6	108.3	57.56	54.1	7.73	0.97	102	1.11	812.845	0.0433594	0	0	1	1	60	0	295	317	388	379	189.3	157.4	148.6	89.7	32.2	26.1	28.8	29.2	155.13	188.34	221.52	230.04	54.67	92.52	125.8	147.35	53.5	43.3
55	1	0	65	22.2222	0	20	10	C	2	23	99.3	28.2	73.66	38.08	44.9	1.09	0.62	51	1.3	89.6613	0.0460993	0	0	0.89	0	143	0	632	567	458	350	2050.9	725.8	325.7	156.8	38.7	41.1	40.7	40.1	83.79	79.36	78.37	71.11	52.3	37.01	37.18	33.46	49.7	51.9
56	0	1	37	17.5781	3	21	12	C	3	26	28.3	39.1	79.29	36.72	61.1	3.5	1.1	93	1.8	295.909	0.0460358	0	0	0.8	1	120	0	388	229	163	134	579.1	134.5	70.7	45.4	41.2	35.5	35.9	36.1	93.67	67.2	42.13	35.92	37.46	28.94	18.52	16.58	85	63.6
57	0	1	54	20.5151	0	21	9	B	3	35	44.8	37.8	23.59	11.89	46.7	1.08	0.18	20	1.2	120	0.031746	0	0	0.797	1	88	0	113	84	82	96	140.5	65.8	58.8	58.7	35.7	35.2	35.6	37.6	59.98	52.25	37.95	31.36	19.04	16.26	12.5	12.38	43.5	43.1
58	1	1	48	18.937	1	11	8	B	2	14	17.4	31.9	22.72	8.64	76.2	1.26	0.29	36	1.9	156.414	0.0595611	0	0	0.74	1	420	0	678	702	586	406	332.8	249.9	145.4	73.3	37.8	38.1	32.4	33.2	201.91	182.91	154.6	160.57	103.55	84.63	90.55	88.41	80.3	83.8
59	1	1	58	24.0569	1	33	12	C	1	45	39.7	39.6	195.31	114.23	207.6	5.94	0.18	44	5.65	1452	0.142677	0	0	0.74	1	186	0	331	252	161	80	516.4	203.8	59.7	30.3	32.3	30.9	34.2	32.1	310.36	286.81	164.84	168.62	137.99	129.22	89.36	96.39	160.7	176.6
60	0	0	54	24.9135	0	29	12	C	3	12	37	33.6	237.07	117.68	80	2.42	0.32	18	3.8	136.125	0.113095	0	0	0.63	0	105	0	185	120	77	53	189.7	93.3	74.1	43.2	34.3	34.7	41.7	43.1	141.61	112.61	118.7	96.31	64.96	38.73	36.94	34.19	131	119
61	1	1	37	22.6562	3	27	9	B	2	91	131.3	29.8	482.3	240.58	62.6	5.78	1.59	155	1.9	563.459	0.0637584	1	0	0.59	0	80	0	491	350	186	127	1401.6	433	129.3	65.9	37.2	32.6	29.4	38.8	485.56	422.76	352.14	462.64	229	248	194	250.3	66	78
62	0	1	57	20.9376	5	7	5	A	3	34	22.9	39.2	10.1	4.06	86.2	4.06	1.68	162	1.6	391.5	0.0408163	0	0	0.78	1	106	0	843	822	689	517	1282.9	511.7	267.1	131.9	46.9	42.1	38.9	37.1	40.4	44	31.34	28.35	24.95	19.8	13.77	11.85	76.1	64.4
63	1	0	46	21.9671	0	7	6	A	2	12	24.7	35	13.02	4.81	64.6	2.02	1.17	85	1.8	146.752	0.0514286	0	0	0.8	0	141	0	388	412	366	243	533.6	463.8	300.5	138.4	46.5	42	42.4	44.6	72.99	52.53	27.87	32.11	31.74	21.43	13.25	14.3	61.9	74.9
64	0	0	20	18.0768	5	12	7	B	3	11	24.1	39.7	6.55	3.58	22.1	12.2	0.71	234	2.92	4020.85	0.0735516	0	0	0.8	0	71	0	316	210	125	91	281.6	122.4	58.2	55.5	37.6	34.2	34.6	29.1	28.09	28.99	39.91	27.98	11.4	12.6	22.13	15.81	22	27.8
65	0	0	23	17.7778	3	13	10	C	3	24	48.7	32.4	20.63	8.3	35.9	0.35	0.32	17	1.63	18.5938	0.0503086	0	0	0.62	0	81	0	168	160	141	98	349.2	211.4	130.1	65.2	37.3	36.4	40.1	38.6	46.15	27.82	34.77	35.5	21.05	12.02	15.01	16.61	27.2	27.6
66	0	1	46	19.487	0	12	10	C	2	17	20.8	35.2	25.79	9.18	55.3	0.92	0.08	57	1.66	655.5	0.0471591	0	0	0.69	1	178	1	163	117	82	66	182.9	56.6	39.7	28.6	38.2	37.1	33.2	33	55.46	27.79	19.77	22.83	22.88	11.65	8.44	9.65	54.2	46.3
67	1	1	45	22.7903	5	36	15	C	3	27	52	27.4	717.87	301.25	93	8.6	0.53	22	2.24	356.981	0.0817518	0	0	0.91	1	162	0	424	535	418	302	530.1	499.2	254.8	142	32.9	34.2	30.9	33.3	327.06	206.77	192.64	323.88	169.44	92.79	111.3	188.74	152.9	147.2
68	0	1	34	38.1551	0	12	9	B	2	35	65	23.3	24.69	7.7	66.1	0.9	1.89	60	1.9	28.5714	0.0815451	1	0	0.54	1	106	0	124	165	168	156	225.7	255	209.9	163.6	34.5	34.8	33.2	32.3	86.73	57.94	49.21	51.47	41.09	30.7	29.16	27.91	84.6	81.5
69	0	1	25	21.2953	4	31	12	C	3	303	364.1	33.8	370.09	186.6	54.6	5.15	0.73	108	2.89	761.918	0.085503	0	0	0.99	1	191	0	475	383	254	186	589.5	254.9	100.8	60.3	36.4	35.2	31.3	31.3	154.07	106.23	65.68	53.9	41.3	31.03	24	21.9	52.4	39
70	0	1	46	23.3887	0	12	9	B	3	15	23.3	34.8	32.87	12.37	66.1	2.01	0.4	54	1.54	271.35	0.0442529	0	0	0.73	1	167	0	257	196	150	89	482.1	177.6	93.1	45.2	40.8	32.5	32.6	33.5	148.69	149.59	95.75	66.97	54.41	37.01	33.61	25.7	59.1	47.6
71	0	1	57	30.116	1	21	12	C	2	26	45.5	40	106.71	44.39	51.4	1.73	0.45	41	1.8	157.622	0.045	0	0	1	1	74	0	224	277	192	124	321.4	235.7	115.2	57.5	33	31.1	33.1	34.9	122.34	54.82	36.17	34.13	65.42	26.25	19.67	16.95	56.6	74.2
72	1	0	64	21.5645	2	23	9	B	3	96	168.4	37.9	486.54	246.34	50.7	9.82	0.82	185	1.9	2215.49	0.0501319	0	0	0.717	0	76	0	177	163	140	91	241.9	140.1	84	49.7	33.1	35.2	34.5	35.8	375.23	204.5	160	140.53	203	104.68	84.65	70.67	51.9	51.1
73	1	0	27	18.4265	5	7	6	A	3	17	26.1	42.4	18.74	7	58.2	2.72	1.59	135	1.58	230.943	0.0372642	0	0	0.86	0	32	0	343	293	193	138	298.6	194.8	116.8	61.3	41.3	38	37.7	35.4	68.17	54.63	42.85	34.01	19.42	15.89	13.84	11.95	52	68.1
74	0	1	50	17.4818	0	20	10	C	2	17	41	35.8	115.47	62.31	84.4	0.97	0.58	37	1.5	61.8793	0.0418994	0	0	0.79	1	144	0	142	108	87	70	443.8	206.5	103	55.7	34.8	34.1	35.2	35.6	225.32	224.68	122.76	142.3	95.59	104.07	62.43	71.81	115.1	80.3
75	0	0	26	23.5102	3	8	5	A	2	18	38.2	38.4	11.78	4.61	77.3	2.4	2.05	270	1.6	316.098	0.0416667	0	1	0.76	0	30	0	367	339	247	219	746.7	368.1	171.3	46.9	44.8	42.7	37.1	39.7	43.37	57.27	46.31	30.56	19.21	14.06	17.95	11.34	71.4	61.5
76	0	0	45	17.6898	3	20	10	C	1	34	67.2	40.1	415.36	185.9	42.4	1.74	0.41	84	1.91	356.488	0.0476309	0	0	1.1	0	117	0	594	471	361	266	838.3	356.5	162.1	69.3	37.6	33.9	40.3	36.8	241.76	201.55	187.56	135.09	80.22	72.21	86.09	71.57	36.2	31.9
77	1	0	60	15.1489	3	15	7	B	2	17	27.9	31.2	33.6	13.05	38.8	4.75	0.78	45	1.5	274.038	0.0480769	0	0	0.87	1	146	1	341	346	284	189	627.3	297.9	125.1	41.5	31.9	34.5	34.7	35.5	116.63	99.19	70.39	70.85	34.95	31.16	26.47	32.01	49.9	45.8
78	0	1	52	21.0938	0	13	9	B	3	26	39.7	36.4	28.66	10.56	58.9	0.55	0.44	39	1.6	48.75	0.043956	0	0	0.86	1	113	0	395	406	278	170	821.9	319.1	114.7	66.8	40.2	31.4	37.4	37.5	92.23	101.72	72.43	72.28	32.15	49.19	37.68	35.36	68.7	59.5
79	1	1	43	25.2493	0	32	11	C	3	126	267.3	31	589.4	268.82	86.2	7.31	1.28	74	2.08	422.609	0.0670968	0	0	1.06	1	148	0	532	408	207	130	879.5	353.6	147.7	87.9	32.9	28.8	31	31.5	370.73	178.76	180.33	209.48	163.46	81.86	92.11	115.69	132.9	182.9
80	1	1	58	25.9259	0	19	11	C	3	13	24.7	33	95.3	22.92	58.8	2.91	0.96	45	1.81	136.406	0.0548485	0	0	0.78	0	165	0	248	246	156	119	526.4	212.7	99.9	55.4	38.2	31.4	31.9	34.2	150.72	159.56	97.68	79.17	41.8	44.88	36.35	37.72	98.4	90.2
81	0	0	45	22.1003	4	30	11	C	2	80	106.7	31.2	261.18	105.03	24.3	3.33	1.34	129	1.62	320.575	0.0519231	1	0	0.6	0	150	0	240	217	159	108	362.5	201	110.5	57.7	34.67	32.7	31.8	31.7	224.04	91.58	67.34	58.86	88.03	38.36	33.03	29.18	44.7	38.8
82	0	1	19	30.7574	3	35	13	C	1	35	85.1	24.5	113.11	53.88	105	6.11	2.37	53	3.05	136.637	0.12449	0	0	1.2	1	172	0	244	237	172	132	419.2	267.2	125.3	79.9	25.4	29	30	32.9	99.23	66.18	36.65	32.69	37.22	24.45	16.56	15.62	152.1	116.1
83	1	0	58	18.3145	2	26	10	C	1	16	123	35.4	479.76	225.96	73.3	1.35	0.56	42	1.29	101.25	0.0364407	0	0	0.82	0	50	0	110	77	46	27	257.1	111.9	68.5	40	30.7	29.1	29	29.8	293.38	224.63	188.63	205.64	146.13	113.93	102.69	114.99	100.4	108
84	1	0	19	20.0617	5	13	9	B	2	44	52.5	33.8	55.59	28.95	42.8	1.64	0.17	33	1.7	318.353	0.0502959	0	0	0.69	0	84	0	402	523	365	248	467.3	336.1	145.7	66.7	36.7	31.7	32.5	31.8	121.12	114.53	90.1	93.18	63.58	57.57	42.73	46.71	52.3	40.3
85	1	0	36	19.2277	2	32	12	C	1	144	384	30	777.19	306.41	56.3	1.74	0.91	105	1.41	200.769	0.047	0	0	0.98	1	175	0	610	480	389	259	1149.6	448.6	238.9	121.8	30.4	33.2	35.9	32.2	511.67	416.56	452.87	389.44	236.26	205.03	224.93	199.2	58.8	56.7
86	0	0	39	15.9439	0	13	9	B	3	19	36.8	32.8	21.14	7.37	48.4	1.13	0.78	68	1.04	98.5128	0.0317073	0	0	0.878	1	80	0	231	220	198	171	419.6	163.2	99.7	77	34.1	36.7	39.9	38	54.19	31.74	26.77	28.26	25.45	13.87	11.71	13.66	54.3	59
87	0	1	60	20.3074	1	8	5	A	3	34	30	42	19.84	5.9	82.7	3.24	0.98	60	1.8	198.367	0.0428571	0	0	0.65	1	99	0	497	404	289	251	646.9	230.9	109.1	93.9	44.9	40.3	35.4	37	129.85	102.12	77.47	84.26	59.75	44.34	39.14	45.7	102.1	78.3
88	1	0	47	23.4375	2	28	12	C	2	48	128.6	30.8	814.92	320.76	64	3.98	1.02	121	1.53	472.137	0.0496753	0	0	1.14	0	99	0	1134	897	644	460	2805.9	950.6	393	173.5	33.3	31.1	34.3	34.2	352.6	261.35	263.01	235.92	144.01	117.42	137.7	130.23	82.2	48.9
89	0	1	45	27.1046	5	37	12	C	3	39	69.4	30	502.36	242.42	121.5	10.26	1.46	41	1.06	288.123	0.0353333	0	0	1.02	1	80	0	279	337	246	197	350.2	263.2	127.9	103.2	31.7	30.5	34.9	31.4	312.64	123.09	139.19	173.47	166.61	68.11	81.43	108.68	169.1	159.8
90	0	0	25	18.6222	2	17	9	B	2	81	134.2	34.5	128.29	65.48	69.5	0.95	1.28	87	1.55	64.5703	0.0449275	0	0	1.01	1	14	0	290	254	240	272	304.6	175.4	117.8	111.8	35.6	38.2	35.3	39.3	158.75	103.94	132	124.29	93.58	58.54	78.4	74.49	56.6	40.2
91	1	0	58	28.306	3	34	13	C	3	146	203.5	36.6	694.6	259.55	36.3	8.92	0.57	38	4.45	594.667	0.121585	0	0	1	1	80	0	126	472	495	412	184.2	434.3	229.9	103.2	34.8	36.6	34.4	36.1	667.28	284.07	182.54	152.46	250.82	127.48	82.75	71.03	33.8	43.8
92	0	1	48	23.8754	5	14	11	C	3	35	28.4	26.1	84.95	38.71	47	6.78	0.94	105	1.76	757.34	0.067433	0	0	1.06	1	217	0	216	168	110	58	305.2	105.4	48	25.8	29.9	26.9	26.1	27	137.38	72.56	40.28	35.84	53.32	26.33	16.48	15.12	58.2	81.2
93	1	1	51	25.4767	1	24	10	C	3	10	15.8	34.9	158.12	84.3	86.6	0.97	0.15	20	1.5	129.333	0.0429799	0	1	0.95	1	15	0	226	750	2897	1446	486.7	903.8	3826.9	1676.6	33.6	34.2	36.7	30.2	266.57	366.8	377.88	304.58	160.1	193.16	180.2	136.51	139.3	199.4
94	1	1	49	20.2812	0	12	5	A	1	22	28.9	36.9	33.06	10.34	77.9	1.5	0.53	45	1.7	127.358	0.0460705	0	0	0.93	1	156	0	377	430	392	264	422.8	311.8	168.4	82.8	32.8	34.5	36.6	35.5	73.29	39.72	34.5	32.69	27.01	15.68	13.77	15.72	77.4	60.8
95	1	0	50	19.6072	3	22	9	B	2	64	160.9	24.6	198.44	100.58	68.8	1.83	0.72	73	1.8	185.542	0.0731707	0	0	1.01	0	60	0	372	342	243	159	592.9	263.4	125.1	57.4	38	34.2	33.1	31.1	170.28	166.04	139.81	129.24	107.86	104.79	89.02	82.5	65.9	54.2
96	0	1	54	20.7157	0	15	7	B	2	47	80.4	24.6	26.21	11.88	105.3	3.64	3.13	142	1.9	165.137	0.0772358	0	0	0.63	1	80	0	451	425	332	251	715.8	336.2	169.6	88.9	33.8	34.5	33.7	33.1	70.75	89.16	65.31	60.15	40.63	55.26	39.24	32.81	115.4	86.6
97	0	1	36	20.4294	0	20	11	C	3	30	44.9	40.3	129.3	50.38	70.1	0.96	0.52	40	1.16	73.8462	0.0287841	0	0	0.73	1	186	0	708	660	452	283	619.7	332.5	111.8	44.9	39.4	40.1	37.4	35.9	115.2	70.91	50.91	42.09	71.23	36.38	25.24	20.91	87.2	73.3
98	1	0	36	28.089	4	34	9	B	2	192	246.5	35.1	686.92	285.03	30.9	9.61	1.18	84	1.96	684.102	0.0558405	1	0	0.88	0	60	0	706	841	616	256	1042.6	2155.7	569.6	197.2	36.2	32.6	32.6	34.8	458.89	632.86	711.5	439.39	228.4	271.95	318.58	241.51	169.4	201
99	1	1	57	23.7387	1	18	10	C	3	21	25.6	36.1	34.27	10.67	98	0.33	1.51	38	1.9	8.30464	0.0526316	0	0	0.66	0	128	0	685	442	300	196	763.9	204.3	101.9	58.6	33.5	33.2	33.9	36.6	124.61	119.78	79.03	79.93	39.07	43.28	38.95	44.33	113.2	114.6
100	0	1	59	19.1406	0	18	12	C	3	9	20.5	29.9	40.88	18.43	91.3	0.75	0.47	70	1.3	111.702	0.0434783	0	0	0.95	1	160	0	159	168	312	250	368.2	190.7	216.6	101.5	37.8	35.6	31.3	31.8	140.91	248.21	147.55	164.98	54.12	73.59	66.24	90.32	103	88.4
101	0	1	48	21.4619	0	13	8	B	2	20	43.2	42.1	37.39	15.66	77.7	2.57	0.72	57	2	203.458	0.0475059	1	1	0.6	0	80	0	213	212	177	174	292.8	189	129.9	119.1	44.6	35.4	38.5	40.1	52.74	30.26	25.53	55.81	25.16	15.26	14.04	34.33	77.2	96.6
102	1	1	59	19.8413	0	9	5	A	1	27	41	38.1	15.71	6.49	99.9	1.74	0.88	102	1.8	201.682	0.0472441	0	0	0.96	1	127	0	1434	1009	749	531	2350	600.3	268	110.5	43.1	38.7	42.2	41.6	55.29	38.19	33.26	38.23	37.44	20.26	14.79	13.79	105.3	78.5
103	0	1	32	17.0068	1	23	12	C	3	18	54.4	29	122.27	71.27	48.3	2.01	0.88	100	1.2	228.409	0.0413793	0	0	0.75	1	147	0	268	172	153	140	348.2	120.1	88.5	64.1	31.9	30.3	31	30.9	141.48	144.69	132.47	122.36	74.92	78.57	81.54	72.72	53.9	42.3
104	0	1	59	25.0762	1	7	8	B	2	17	44.8	33.3	18.5	6.53	59.3	3.46	0.32	56	1.12	605.5	0.0336336	0	0	0.73	0	162	0	314	330	407	309	619.7	426.8	454.3	257.4	40	38.6	34.9	33.2	70.83	48.41	42.15	43	38.96	23.86	22.73	26.11	123.9	118.2
105	0	0	20	20.4284	3	32	11	C	3	40	77.9	35.2	358.87	171.46	69.4	2.98	0.9	62	1.3	205.289	0.0369318	0	0	0.99	1	108	0	257	224	190	179	269.8	139.7	94	79.5	35.8	34.5	34	35.7	366.38	137.31	145.29	126.35	209.4	78.57	88.56	72.32	73.8	57.8
106	0	1	53	26.9896	0	27	12	C	3	124	253.7	37.6	512.27	240.55	56.8	4.81	1.19	82	1.2	331.445	0.0319149	0	0	0.88	1	80	0	303	231	156	114	580.3	310	135.1	77.2	34.7	31.7	29.4	29.8	324.67	168.67	131.46	135.68	161.58	90.74	82.04	83.22	80.8	70.9
107	1	0	57	23.3887	0	8	5	A	1	22	42.6	37.5	11.45	2.7	79.2	1.94	0.51	39	0.93	148.353	0.0248	1	0	0.76	0	162	0	660	900	935	664	1067.9	715.3	499.2	214.1	43	38.5	38.6	41.7	36.1	25.37	19.07	24.61	8.47	7.58	5.91	7.28	85.2	73.4
108	1	0	53	30.4867	2	28	11	C	3	187	207.2	31.6	457.28	216.3	37.8	10.59	0.82	103	1.3	1330.21	0.0411392	0	0	0.99	1	134	0	616	433	289	187	711	245.6	87.1	41.5	36.3	33	31.6	32.9	318.86	246.26	284.93	216.87	138.99	119.19	143.91	115.45	45.1	39.7
109	1	0	32	25.1808	3	18	7	B	2	29	47.7	38.3	46.19	12.66	63.1	1.23	0.56	31	1.53	68.0893	0.0399478	0	0	0.82	1	78	1	207	261	218	173	374.6	263.8	153.6	96.9	38.9	34.2	33.2	30.8	130.84	63.6	43.95	22.94	26.63	17.02	14.69	10.48	63.3	53.7
110	0	0	64	23.2446	2	15	8	B	2	25	49.8	29.8	27.3	11.96	97.6	1.1	0.34	47	1.4	152.059	0.0469799	0	0	0.8	0	113	0	344	238	191	150	302.7	124.9	87.4	58.6	32.4	33	43.5	38	96.23	35.96	46.4	35.72	64.86	20.97	25.79	20.35	104.8	109.1
111	0	1	49	21.048	0	20	11	C	3	34	18.2	39.4	33.8	12.13	93.2	6.68	0.88	67	0.86	508.591	0.0218274	0	0	1.15	1	162	1	725	454	312	209	833.8	181.1	69.3	47.8	30	27.4	29.8	32.7	131.12	67.55	70.45	94.11	86.05	45.09	47.03	61.55	82.3	94.8
112	1	1	51	19.9082	0	14	8	B	2	19	34.3	33.4	46.9	11.39	73.7	1.92	0.77	44	1.7	109.714	0.0508982	0	0	0.52	0	77	0	216	165	144	116	256.9	155.3	124.6	84.8	35	36.2	36	34.8	69.75	43.4	37.33	34.95	27.21	14.59	14.76	12.74	95.7	99.8
113	0	0	48	17.1468	2	17	10	C	3	49	107.2	32.6	130.14	66.94	56.2	2.17	0.77	55	1.29	155	0.0395706	0	0	0.58	0	120	0	284	194	163	129	294.9	119.3	79.8	58.7	39.7	39.7	36	37.7	174.92	171.49	176.17	159	54.62	46.91	68.67	74.07	64.1	65.4
114	1	1	33	24.5675	5	13	9	B	2	40	52.3	22.3	23.22	5.1	50.8	1.35	0.66	36	2.06	73.6364	0.0923767	1	0	0.71	0	161	0	314	466	1383	853	548.7	456	3196.6	1052.5	28.4	28.2	34.1	29.6	55.97	43.31	86.8	95.75	21.13	22.1	37.81	59.81	80.2	206.2
115	1	0	60	21.9671	5	10	8	B	2	18	40.6	29.5	23.4	10.2	47.5	1.17	0.42	62	1.5	172.714	0.0508475	0	0	0.88	1	142	0	592	481	447	369	791	385.9	279.3	159.3	34.1	33	36	33.6	72.28	38.02	30.06	28.88	39.61	17.25	14.72	15.04	62.5	53.7
116	0	0	23	23.5294	5	15	8	B	2	13	33.6	27.5	39.41	15.5	30.6	1.64	0.6	33	1.6	90.2	0.0581818	0	0	0.918	0	113	0	336	314	236	181	396.3	264.6	151.5	77.1	29.2	31.9	33.2	34.3	81.36	43.65	88.78	106.46	33.87	17.51	43.87	57.33	44.1	47.8
117	0	0	47	20.4382	0	11	8	B	2	22	22	36.3	15.04	3.05	57.6	0.68	31.2	35	1.6	0.762821	0.0440771	0	0	1.06	1	90	0	843	827	655	431	819.1	423.5	195.8	86.3	39.8	35.9	36.1	35.6	155.25	127.42	112.1	101.82	78.56	54.33	52.98	49.49	68.9	52.8
118	1	1	20	21.2245	2	27	13	C	3	133	324.4	26	766.19	439.46	66.8	5.52	0.93	135	1.74	801.29	0.0669231	0	0	1.06	1	90	0	573	452	344	261	617.3	269.4	134.2	95.6	28.4	26.5	27.9	31.2	416.7	252.54	220.76	247.95	266.07	139.23	138.14	150.78	75.6	66.5
119	1	1	32	19.0311	0	40	13	C	3	22	59.3	30.7	635	397.82	571.7	5.97	2.17	100	1.8	275.115	0.0586319	0	1	0.87	1	188	0	221	201	140	83	490	228.1	96.3	49.2	31.4	30.6	29.7	31.3	315.47	261.34	168.77	193.34	142.8	95.28	91.48	115.83	268.2	154.4
120	0	1	54	19.4674	5	10	5	A	1	31	52.9	40.7	33.09	14.58	53	1.97	0.61	44	0.99	142.098	0.0243243	0	0	0.86	1	165	0	274	232	181	149	370.5	146.7	82.2	57.5	40.5	36.8	37.7	38.2	78.9	65.64	48.16	49.05	24.1	14.09	13.65	15.33	79.5	70.6
121	0	1	52	22.2656	0	11	7	B	2	33	54.7	33.9	43.9	10.15	69.4	3.66	1.22	106	1.8	318	0.0530973	0	0	0.9	1	167	1	552	559	455	343	574.5	318.8	149	81.4	40.1	37.3	35.7	34.8	60.37	24.86	17.89	16.71	32.26	14.54	10.8	10.53	79.1	67.4
122	0	0	47	17.1753	3	17	11	C	3	58	83.5	35	84.84	32.78	74.2	1.75	1.07	73	1.24	119.393	0.0354286	0	0	1.1	1	200	0	530	402	264	189	518	181.7	85.8	44.4	35	33.7	31.5	35.1	75.69	51.74	37.67	46.16	33.82	23.09	14.38	23.8	45.7	51.8
123	0	0	52	25.5354	0	26	10	C	3	123	50.5	30.7	198.31	71.67	58.3	2.66	0.71	27	1.7	101.155	0.0553746	1	0	0.9	0	80	0	216	149	133	115	401.4	137	91	66.8	41.3	37.7	34.3	34.6	155.23	69.48	46.49	44.39	49.48	22.25	23.36	23.06	54.7	46.6
124	0	1	19	20.9877	4	30	11	C	3	42	59.5	32.9	571.91	400.68	96	5.33	1.03	37	2.11	191.466	0.0641337	0	0	1.1	0	105	0	321	326	216	152	378.3	224.6	96.1	54.3	34	30.1	30.1	26.8	318.15	294.21	328.64	281.93	205.44	204.37	233.45	146.81	98.3	85.2
125	0	1	19	20.7157	3	14	8	B	2	13	22.1	37.9	44.16	12.58	53.6	4.04	1.59	233	2.62	592.025	0.0691293	1	0	0.519	0	136	0	806	756	582	435	894	497.2	241.8	129.3	46	38.6	34.3	34.9	56.69	35.29	28.29	30.21	20.93	8.22	11.12	14.76	62	45.1
126	0	1	20	25.9516	5	20	5	A	1	7	9.8	43	10.74	3.1	1009.7	4.45	2.8	275	0.73	437.054	0.0169767	0	0	1.1	1	200	0	243	217	207	153	337.6	195.1	161	92.1	42.8	38.6	36.8	36.1	43.43	13.57	22.81	22.28	27.47	3.83	13.65	13.7	793.1	489.3
127	0	1	53	21.2084	0	7	5	A	1	47	39.1	43.2	23.73	3.32	75.6	3.49	1.54	137	1.8	310.474	0.0416667	0	0	0.86	0	90	0	477	373	277	222	353.4	175.1	100	72.2	37.8	33.8	31.4	38.8	60.61	60.87	49.86	60.91	9.41	8.22	14.19	14.84	77.2	68.3
128	0	1	29	18.75	5	11	7	B	2	13	12.9	32.2	19.66	8.03	66.8	1.33	0.36	51	2.51	188.417	0.0779503	1	0	0.81	0	90	0	292	265	189	135	336	137.4	79.6	48.7	33.6	31	29.4	27.7	32.23	28.36	18.98	26.55	7.75	10.92	8.95	12.33	62.8	64.5
129	0	1	42	15.2249	0	12	6	A	1	46	51.3	36.2	30.79	13.32	51.8	1.08	0.4	42	1.79	113.4	0.0494475	0	0	0.8	0	205	0	150	118	86	69	257.5	84.1	50.2	36.2	40.1	31.9	28.9	32.9	109.39	53.2	42.58	55.35	62.97	12.27	11.13	17.65	64.3	54
130	0	0	40	18.424	2	22	10	C	3	49	126.7	25.7	218.29	156.9	54.7	2.39	0.49	113	1.11	551.163	0.0431907	0	0	1.6	1	195	0	354	272	225	177	708.3	247.3	118.9	80.3	27.6	30.6	31	33	167.5	154.52	123.23	110.98	55.88	55	52.48	59.23	80.9	57.2
131	1	0	23	21.1069	5	35	13	C	3	167	126.7	26.2	824.78	423.09	63.8	35.04	1.71	103	1.98	2110.6	0.0755725	0	0	1.2	1	224	0	460	305	197	115	420.7	98	45.3	33.6	19	26.2	27.8	29.8	367.98	227.6	243.88	210.44	248.82	134.29	157.65	140.72	78.3	54.7
132	0	0	20	24.2215	4	40	11	C	3	17	21.2	34.2	387.63	70.45	271.9	10.44	2.34	132	3.02	588.923	0.0883041	0	0	1.72	0	136	0	124	151	89	63	567	442.4	158.7	90.7	32.6	36	37.1	38	249.45	134.07	81	61.66	124.78	75.46	47.84	41.85	272	225.1
133	0	0	50	16.901	2	14	7	B	2	10	82.8	33.7	18.47	5.3	54.8	1.19	0.84	33	1.8	46.75	0.0534125	1	0	0.58	1	90	0	169	170	139	109	553.5	450	324.5	185.8	34	29.6	29.3	29	29.91	29.75	23.07	27.5	19.23	16.98	9.72	17.78	70.7	60.1
134	1	1	52	21.6311	0	16	8	B	2	29	35.1	43.1	37.96	7.52	73.1	1.06	45	1.06	1.8	0.0249689	0.0417633	1	0	0.46	0	128	0	281	369	290	185	299.7	258.2	146.1	77.9	18.7	30.5	27.9	32.5	85.95	97.17	83.38	97.73	26.86	19.47	24.07	35.94	88.1	83.2
135	0	0	44	17.2584	0	21	14	C	3	55	92.4	24.3	97.81	58.89	67.9	1.71	0.73	24	1.66	56.2192	0.0683128	0	0	1.03	1	220	0	208	166	137	49	404.5	174.6	97.2	58.8	19.9	26.5	32	18	132.6	139.88	90.49	78.69	47.73	59.58	42.51	41.95	106	183.1
136	0	1	29	17.7999	0	10	7	B	2	28	34.4	38	18.87	4.33	67.5	2.37	2.2	382	1.6	411.518	0.0421053	1	0	0.544	1	91	0	651	714	566	363	1478.7	613.9	286.4	136.1	37.8	35.9	34.1	39.2	52.81	47.33	40.28	37.33	16	16.9	17.54	14.85	89.1	62.8
Primary Disease*	virus hepatitis	0
	alcoholic cirrhosis	1
	cholestatic/autoimmune liver disease	2
	Hereditary metabolic liver disease	3
	toxicity/drug-induced liver injury	4
	cryptogenic liver disease/other	5
[truncated: 6 more columns]
